# Supplementary material
Source: PubMed Central journal article supplement (PMC4011497)
Supplement: NIHMS559620-supplement-01.pdf [file NIHMS559620-supplement-01.pdf]

Supplemental Data

**A**

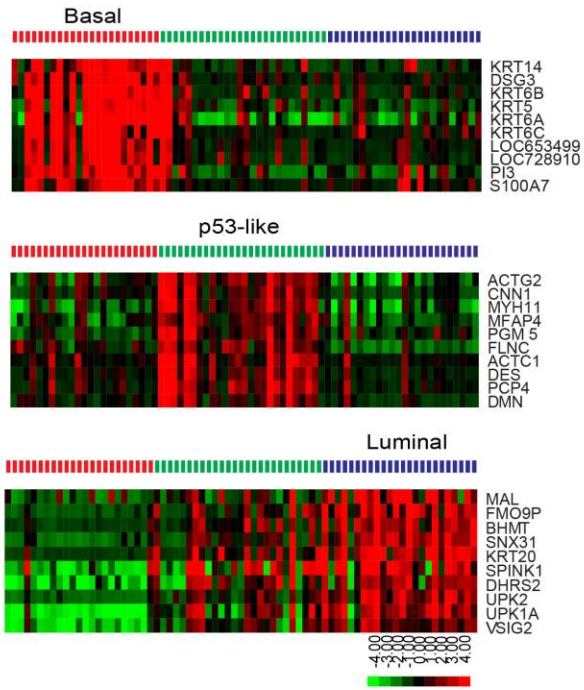

**B**

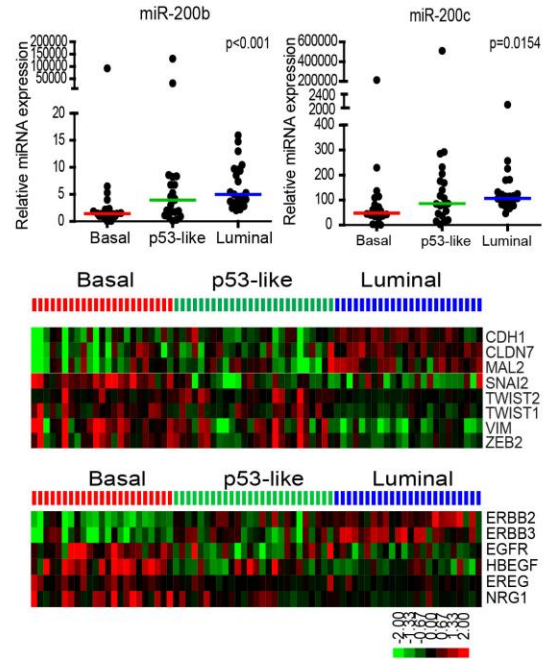

**C**

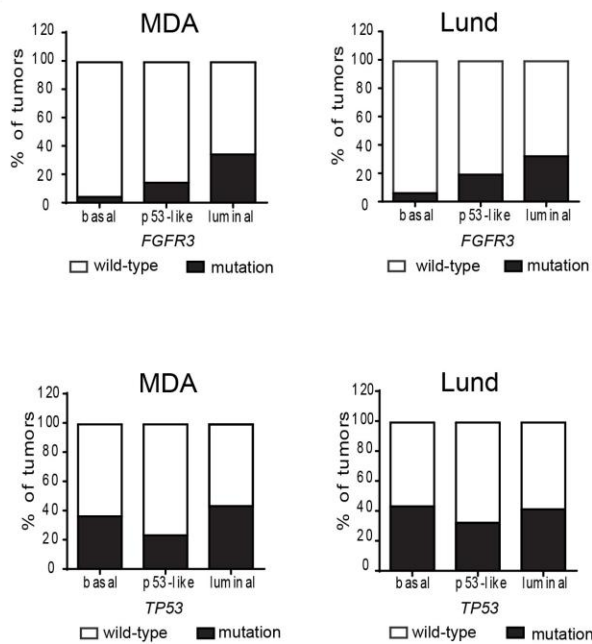

**D**

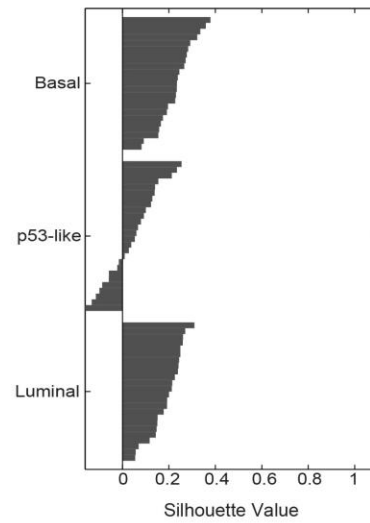

**Figure S1. Related to Figure 1.**

Biomarkers in the basal and luminal subtypes. A. Top 10 upregulated probes based on fold changes in each subtype ( $p < 0.001$ ,  $FDR < 0.1$ ). Heat maps display the top upregulated genes in the basal (top), p53-like (middle), and luminal (bottom) subtypes in the MD Anderson discovery cohort. B. Relative expression of EMT markers and components the EGFR pathway in the 3 subtypes. miR-200b and miR-200c levels were measured by quantitative RT-PCR. The line shows the median expression of miR-200b/c in each subtype. The heat maps display EMT marker (top) and EGFR pathway (bottom) gene expression as a function of subtype in the MD Anderson discovery cohort. C. *FGFR3* and *TP53* mutation distributions in the subtypes. D. Silhouette scores were calculated to determine stability of tumor classification and are displayed as a function of subtype membership.

**Table S1. Related to Figure 2.**

Clinicopathologic Characteristics of the MDA validation Cohort (n=57)

|                                                   | TOTAL       | Basal       | p53-like    | Luminal     | p-value      |
|---------------------------------------------------|-------------|-------------|-------------|-------------|--------------|
| Cohort Size                                       | 57          | 13 (23%)    | 25 (44%)    | 19 (33%)    |              |
| Mean Age (y) ± SD                                 | 65.7 ± 10.8 | 63.3 ± 10.1 | 66.8 ± 8.6  | 66.0 ± 13.7 | 0.649        |
| Gender                                            |             |             |             |             |              |
| Male                                              | 49 (86%)    | 10 (77%)    | 22 (88%)    | 17 (90%)    | 0.560        |
| Female                                            | 8 (14%)     | 3 (23%)     | 3 (12%)     | 2 (11%)     |              |
| Race                                              |             |             |             |             |              |
| Caucasian                                         | 48 (84%)    | 11 (85%)    | 23 (92%)    | 15 (74%)    | 0.554        |
| African American                                  | 3 (5%)      | 1 (8%)      | 0 (0%)      | 2 (11%)     |              |
| Hispanic                                          | 4 (7%)      | 1 (8%)      | 1 (4%)      | 2 (11%)     |              |
| Asian                                             | 1 (2%)      | 0 (0%)      | 1 (4%)      | 0 (0%)      |              |
| Clinical Stage at TUR (N0,M0)                     |             |             |             |             |              |
| ≤ cT1                                             | 11 (19%)    | 0 (0%)      | 6 (24%)     | 5 (26%)     | 0.178        |
| cT2                                               | 36 (63%)    | 9 (69%)     | 16 (64%)    | 11 (58%)    |              |
| cT3                                               | 7 (12%)     | 3 (23%)     | 1 (4%)      | 3 (16%)     |              |
| cT4                                               | 0 (0%)      | 0 (0%)      | 0 (0%)      | 0 (0%)      |              |
| Positive Clinical Lymph Nodes, cN+                | 1 (2%)      | 0 (0%)      | 1 (4%)      | 0 (0%)      | 0.521        |
| Positive Clinical Metastasis, cM+                 | 2 (94%)     | 1 (8%)      | 1 (4%)      | 0 (0%)      | 0.501        |
| Neoadjuvant Chemotherapy                          | 0 (0%)      | 0 (0%)      | 0 (0%)      | 0 (0%)      |              |
| Pathologic T stage                                |             |             |             |             |              |
| pT0                                               | 0 (0%)      | 0 (0%)      | 0 (0%)      | 0 (0%)      | 0.454        |
| pTa, pT1, pTis                                    | 2 (4%)      | 0 (0%)      | 1 (4%)      | 1 (5%)      |              |
| pT2                                               | 13 (23%)    | 1 (8%)      | 9 (36%)     | 3 (16%)     |              |
| pT3                                               | 33 (58%)    | 9 (69%)     | 12 (48%)    | 12 (63%)    |              |
| pT4                                               | 9 (16%)     | 3 (23%)     | 3 (12%)     | 3 (16%)     |              |
| Positive Pathologic Lymph Nodes                   | 36 (63%)    | 9 (69%)     | 15 (60%)    | 12 (63%)    | 0.855        |
| Variant histology at cystectomy                   |             |             |             |             |              |
| Squamous Differentiation                          | 6 (11%)     | 5 (39%)     | 1 (4%)      | 0 (0%)      | <b>0.007</b> |
| Sarcomatoid Differentiation                       | 3 (5%)      | 2 (15%)     | 0 (0%)      | 1 (5%)      |              |
| Other (Micropapillary, Glandular, Adenocarcinoma) | 8 (14%)     | 1 (8%)      | 3 (12%)     | 4 (21%)     |              |
| Median Overall Survival (m)                       | 79.2        | 25.0        | 105.9       | 79.2        | <b>0.011</b> |
| Median Disease Specific Survival (m)              | Not Reached | 25.3        | Not Reached | 79.2        | <b>0.004</b> |

The Kruskal-Wallis test was used to compare differences in mean age between groups. Log-rank test was used to compare differences in survival (overall and disease specific) between groups. For the remainder of categorical variables, Fisher's exact test was used to determine differences between subtypes. p-values <0.05 were considered significant.

**Table S2. Related to Figure 2.**

Clinicopathologic Characteristics of the Chungbuk Cohort (n=55)

|                                         | TOTAL       | Basal      | p53-like    | Luminal     | p-value      |
|-----------------------------------------|-------------|------------|-------------|-------------|--------------|
| Cohort Size                             | 55          | 11 (20%)   | 23 (42%)    | 21 (38%)    |              |
| Mean Age (y) ± SD                       | 67.3 ± 10.1 | 69.6 ± 8.4 | 61.5 ± 10.5 | 72.5 ± 7.1  | <b>0.001</b> |
| Gender                                  |             |            |             |             |              |
| Male                                    | 42 (76%)    | 6 (55%)    | 21 (91%)    | 15 (71%)    | <b>0.049</b> |
| Female                                  | 13 (24%)    | 5 (46%)    | 2 (9%)      | 6 (29%)     |              |
| Clinical T Stage (N0,M0)                |             |            |             |             |              |
| ≤ cT1                                   | 0 (0%)      | 0 (0%)     | 0 (0%)      | 0 (0%)      | 0.906        |
| cT2                                     | 22 (40%)    | 3 (27%)    | 10 (44%)    | 9 (43%)     |              |
| cT3                                     | 11 (20%)    | 3 (27%)    | 4 (17%)     | 4 (19%)     |              |
| cT4                                     | 11 (20%)    | 1 (9%)     | 3 (13%)     | 7 (13%)     |              |
| Positive Clinical Lymph Nodes<br>- cN+  | 15 (27%)    | 4 (36%)    | 6 (26%)     | 5 (24%)     | 0.740        |
| Positive Clinical Metastasis<br>- cM+   | 7 (13%)     | 1 (9%)     | 4 (17%)     | 2 (10%)     | 0.679        |
| Systemic Chemotherapy                   | 25 (46%)    | 5 (46%)    | 13 (57%)    | 7 (33%)     | 0.304        |
| Median Overall Survival (m)             | 17.1        | 10.4       | 26.4        | Not Reached | 0.058        |
| Median Disease Specific<br>Survival (m) | 26.4        | 11.2       | 66.3        | Not Reached | 0.102        |

The Kruskal-Wallis test was used to compare differences in mean age between groups. Log-rank test was used to compare differences in survival (overall and disease specific) between groups. For the remainder of categorical variables, Fisher's exact test was used to determine differences between subtypes. p-values <0.05 were considered significant.

**Table S3. Related to Figure 3.**

Clinicopathologic Characteristics of the Lund Cohort (n=93)

|                                      | TOTAL       | Basal       | p53-like    | Luminal     | p-value          |
|--------------------------------------|-------------|-------------|-------------|-------------|------------------|
| Cohort Size (n)                      | 93          | 30 (32%)    | 32 (35%)    | 31 (33%)    |                  |
| Mean Age (y) ± SD                    | 71.8 ± 11.6 | 76.2 ± 11.0 | 71.7 ± 11.7 | 67.6 ± 10.9 | <b>0.012</b>     |
| Gender (n)                           |             |             |             |             |                  |
| Male                                 | 68 (73%)    | 17 (57%)    | 27 (84%)    | 24 (77%)    | <b>0.039</b>     |
| Female                               | 25 (27%)    | 13 (43%)    | 5 (16%)     | 7 (23%)     |                  |
| Clinical Stage at TUR (n)            |             |             |             |             |                  |
| cT2                                  | 85 (91%)    | 28 (93%)    | 30 (94%)    | 27 (87%)    | 0.666            |
| cT3                                  | 7 (8%)      | 2 (7%)      | 2 (6%)      | 3 (10%)     |                  |
| cT4                                  | 1 (1%)      | 0 (0%)      | 0 (0%)      | 1 (3%)      |                  |
| Primary Treatment (n)                |             |             |             |             |                  |
| Cystectomy                           | 51 (55%)    | 12 (40%)    | 18 (56%)    | 21 (68%)    | 0.092            |
| Other                                | 42 (45%)    | 18 (60%)    | 14 (44%)    | 10 (32%)    |                  |
| Positive Pathologic Lymph Nodes (n)  | 20 (39%)    | 4 (33%)     | 9 (50%)     | 7 (33%)     | 0.507            |
| Variant histology (squamous)*        | 17 (18%)    | 16 (53%)    | 1 (3%)      | 0 (0%)      | <b>&lt;0.001</b> |
| Median Disease Specific Survival (m) | Not Reached | 34.8        | 36.4        | Not Reached | 0.860            |

\*squamous differentiation was noted specifically in 17 tumors based on publically available data. The Kruskal-Wallis test was used to compare differences in mean age between groups. Log-rank test was used to compare differences in survival between groups. For the remainder of categorical variables, Fisher's exact test was used to determine differences between subtypes. p-values <0.05 were considered significant

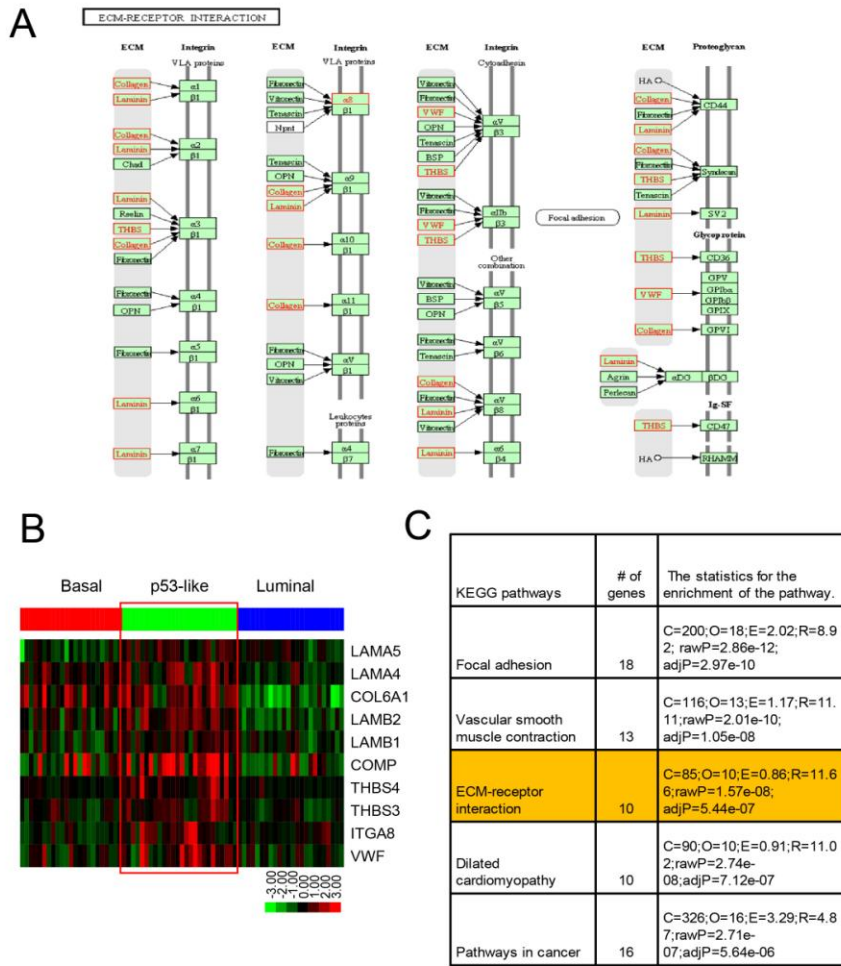

**Figure S2. Related to Figure 3.**

Enrichment of ECM-receptor and ECM biomarkers indicative of stromal fibroblast infiltration in the p53-like tumors. A. ECM-receptor interaction in the p53-like tumors as determined using the mRNA expression profiling data from the MD Anderson discovery cohort and KEGG pathway analysis. B. Significantly differentially expressed genes in ECM receptor interaction pathway. C. Top five significant KEGG pathways as determined using the significantly upregulated genes in the p53-like tumors. The analysis was performed using WebGestalt (<http://genereg.ornl.gov/webgestalt>). The statistics column lists the number of reference genes in the category (C), the number of genes in the gene set that are also in the category (O), the expected number in the category (E), the ratio of enrichment (R), the p value from a hypergeometric test (rawP), and the p value adjusted by the multiple test adjustment (adjP).

**Table S4. Related to Figure 3.**

Clinicopathologic Characteristics of the UCSF Cohort (n=53)

|                                     | TOTAL       | Basal       | p53-like    | Luminal     | p-value      |
|-------------------------------------|-------------|-------------|-------------|-------------|--------------|
| Cohort Size                         | 53          | 15 (28%)    | 14 (27%)    | 24 (45%)    |              |
| Mean Age (y) ± SD                   | 64.7 ± 12.1 | 67.5 ± 12.4 | 61.2 ± 14.2 | 65.0 ± 10.6 | 0.407        |
| Gender                              |             |             |             |             |              |
| Male                                | 37 (70%)    | 10 (67%)    | 9 (64%)     | 18 (75%)    | 0.748        |
| Female                              | 16 (30%)    | 5 (33%)     | 5 (36%)     | 6 (25%)     |              |
| Pathologic T stage (n)              |             |             |             |             |              |
| pT2                                 | 14 (26%)    | 5 (33%)     | 3 (22%)     | 6 (25%)     | 0.293        |
| pT3                                 | 26 (49%)    | 4 (27%)     | 9 (64%)     | 13 (54%)    |              |
| pT4                                 | 13 (25%)    | 6 (40%)     | 2 (14%)     | 5 (21%)     |              |
| Positive Pathologic Lymph Nodes (n) | 17 (32%)    | 3 (20%)     | 7 (50%)     | 7 (29%)     | 0.403        |
| Variant histology (squamous)*       | 6 (11%)     | 4 (27%)     | 2 (14%)     | 0 (0%)      | <b>0.035</b> |
| Median Overall Survival (m)         | 17.7        | 11.3        | 15.5        | 19.5        | 0.880        |

\*Squamous differentiation. The Kruskal-Wallis test was used to compare differences in mean age between groups. Log-rank test was used to compare differences in survival between groups. For the remainder of categorical variables, Fisher's exact test was used to determine differences between subtypes. p-values <0.05 were considered significant.

**Table S5. Related to Figure 3.**

## Clinicopathologic Characteristics of the TMA Cohort

|                                     | TOTAL       | TCC         | TCC with squamous differentiation | p-value           |
|-------------------------------------|-------------|-------------|-----------------------------------|-------------------|
| Cohort Size                         | 332         | 267         | 44                                |                   |
| Mean Age (y) ± SD                   | 65.9 ± 10.2 | 65.8 ± 10.3 | 66.9 ± 9.9                        | 0.478             |
| Gender                              |             |             |                                   |                   |
| Female                              | 75 (23%)    | 66 (23%)    | 9 (21%)                           | 0.863             |
| Male                                | 256 (77%)   | 221 (77%)   | 35 (80%)                          |                   |
| Preoperative Chemotherapy           |             |             |                                   |                   |
| Yes                                 | 3 (1%)      | 2 (1%)      | 1 (2%)                            | 0.506             |
| No                                  | 327 (99%)   | 284 (99%)   | 43 (98%)                          |                   |
| Unknown                             | 3 (1%)      | 3 (1%)      | 0 (0%)                            |                   |
| Adjuvant Chemotherapy               |             |             |                                   |                   |
| Yes                                 | 77 (23%)    | 65 (27%)    | 12 (23%)                          | 0.102             |
| No                                  | 215 (65%)   | 192 (67%)   | 23 (52%)                          |                   |
| Unknown                             | 40 (12%)    | 31 (11%)    | 9 (21%)                           |                   |
| Pathologic T stage                  |             |             |                                   |                   |
| pT3 (not specified)                 | 62 (19%)    | 57 (20%)    | 5 (11%)                           | 0.329             |
| pT3a                                | 158 (48%)   | 137 (48%)   | 21 (48%)                          |                   |
| pT3b                                | 112 (34%)   | 94 (33%)    | 18 (41%)                          |                   |
| Pathologic N stage                  |             |             |                                   |                   |
| pN0                                 | 244 (74%)   | 208 (72%)   | 36 (82%)                          | 0.371             |
| pN+                                 | 81 (24%)    | 74 (26%)    | 7 (16%)                           |                   |
| pNx                                 | 7 (2%)      | 6 (2%)      | 1 (2%)                            |                   |
| Pathologic M stage                  |             |             |                                   |                   |
| pM0                                 | 330 (99%)   | 286 (99%)   | 44 (100%)                         | 0.794             |
| pM1                                 | 2 (1%)      | 2 (1%)      | 0 (0%)                            |                   |
| KRT 5/6 % positive staining (± SEM) | 25.1 ± 1.7  | 20.9 ± 1.6  | 52.7 ± 5.4                        | <b>&lt;0.0001</b> |
| KRT 20 % positive staining (± SEM)  | 2.7 ± 0.5   | 3.0 ± 0.5   | 0.10 ± 0.06                       |                   |

\*SD= Standard Deviation, SEM= Standard effect of the mean



**Table S6. Related to Figure 4.**

Predicted upstream regulators within the 3 subtypes (TF\*)

|          | Predicted Activation State :Activated |                    |                    | Predicted Activation State :Inhibited |                    |                    |
|----------|---------------------------------------|--------------------|--------------------|---------------------------------------|--------------------|--------------------|
|          | Upstream Regulator                    | Activation z-score | p-value of overlap | Upstream Regulator                    | Activation z-score | p-value of overlap |
| Basal    | STAT3                                 | 4.832              | 6.66E-18           | ER*                                   | -3.646             | 1.18E-11           |
|          | NFκB(complex)                         | 6.837              | 9.35E-15           | TRIM24                                | -4.000             | 7.28E-09           |
|          | IRF7                                  | 5.543              | 1.75E-10           | PPARA                                 | -2.815             | 3.28E-05           |
|          | JUN                                   | 2.295              | 5.99E-10           | Hdac                                  | -2.088             | 5.97E-05           |
|          | STAT1                                 | 4.396              | 7.46E-10           | GATA3                                 | -2.566             | 1.49E-04           |
|          | SP1                                   | 2.227              | 1.39E-09           | N-cor                                 | -2.449             | 4.28E-04           |
|          | TP63                                  | 3.434              | 1.95E-08           | PIAS4                                 | -2.000             | 2.57E-03           |
|          | RELA                                  | 2.793              | 2.23E-08           | KLF2                                  | -2.366             | 3.48E-03           |
|          | HIF1A                                 | 3.606              | 4.92E-07           | SPDEF                                 | -2.931             | 4.92E-03           |
|          | IRF3                                  | 2.82               | 5.77E-07           | MEOX2                                 | -2.646             | 1.54E-02           |
| P53-like | TP53                                  | 4.814              | 9.08E-17           | TBX2                                  | -4.690             | 1.92E-13           |
|          | CDKN2A                                | 4.748              | 3.78E-12           | FOXM1                                 | -2.797             | 4.04E-10           |
|          | RB1                                   | 2.071              | 5.70E-09           | MYC                                   | -4.208             | 8.37E-06           |
|          | MYOCD                                 | 3.366              | 9.94E-09           | SMAD7                                 | -2.704             | 8.55E-05           |
|          | MKL1                                  | 2.956              | 7.52E-08           | E2F2                                  | -2.236             | 4.50E-04           |
|          | TCF3                                  | 3.889              | 1.14E-07           | MYCN                                  | -2.779             | 5.42E-04           |
|          | SMARCB1                               | 3.637              | 3.75E-06           | AHR                                   | -2.850             | 8.86E-04           |
|          | SRF                                   | 3.847              | 5.29E-06           | HEY2                                  | -2.168             | 9.36E-04           |
|          | HTT                                   | 2.333              | 2.30E-05           | NFE2L2                                | -2.707             | 4.29E-02           |
|          | Rb                                    | 2.425              | 1.80E-03           | SPDEF                                 | -2.236             | 1.14E-01           |
| Luminal  | AHR                                   | 2.540              | 3.65E-12           | TP53                                  | -3.296             | 2.27E-15           |
|          | ER**                                  | 5.505              | 9.02E-12           | STAT3                                 | -4.084             | 3.15E-14           |
|          | MYC                                   | 3.710              | 1.10E-10           | SMARCA4                               | -2.218             | 1.46E-11           |
|          | SPDEF                                 | 3.615              | 1.19E-08           | PGR                                   | -2.175             | 2.35E-10           |
|          | Hdac                                  | 2.089              | 9.77E-08           | NFκB(complex)                         | -5.342             | 3.03E-10           |
|          | SMAD7                                 | 3.504              | 2.40E-07           | STAT1                                 | -2.414             | 7.34E-10           |
|          | PPARA                                 | 3.246              | 7.64E-05           | HTT                                   | -2.983             | 1.70E-08           |
|          | TRIM24                                | 3.742              | 5.93E-04           | SMAD3                                 | -3.870             | 5.92E-08           |
|          | PPARG                                 | 2.768              | 1.08E-03           | SRF                                   | -4.105             | 7.32E-08           |
|          | SREBF2                                | 3.255              | 6.12E-03           | MKL1                                  | -2.960             | 3.79E-07           |

\*TF: transcriptional factors in Molecule Type \*\*ER: Estrogen Receptor

**Table S7. Related to Figure 4.**

Predicted upstream regulators in the p53-like subtype for 73 or 64 tumors (TF\*)

| Upstream Regulator | Predicted Activation State | 73 tumors          |                    | 64 tumors          |                    |
|--------------------|----------------------------|--------------------|--------------------|--------------------|--------------------|
|                    |                            | Activation z-score | p-value of overlap | Activation z-score | p-value of overlap |
| TP53               | Activated                  | 4.814              | 9.08E-17           | 5.185              | 6.13E-26           |
| CDKN2A             | Activated                  | 4.748              | 3.78E-12           | 3.842              | 1.53E-12           |
| RB1                | Activated                  | 2.071              | 5.70E-09           | 2.813              | 1.42E-09           |
| MYOCD              | Activated                  | 3.366              | 9.94E-09           | 3.492              | 5.61E-08           |
| MKL1               | Activated                  | 2.956              | 7.52E-08           | 2.411              | 1.31E-04           |
| TCF3               | Activated                  | 3.889              | 1.14E-07           | 4.455              | 1.30E-08           |
| SMARCB1            | Activated                  | 3.637              | 3.75E-06           | 4.469              | 2.10E-08           |
| SRF                | Activated                  | 3.847              | 5.29E-06           | 3.867              | 2.87E-08           |
| Rb                 | Activated                  | 2.425              | 1.80E-03           | 2.97               | 1.25E-04           |
| TBX2               | Inhibited                  | -4.69              | 1.92E-13           | -5.000             | 5.15E-13           |
| FOXO1              | Inhibited                  | -2.797             | 4.04E-10           | -3.114             | 1.73E-11           |
| MYC                | Inhibited                  | -4.208             | 8.37E-06           | -5.014             | 9.82E-13           |
| SMAD7              | Inhibited                  | -2.704             | 8.55E-05           | -3.307             | 9.83E-06           |
| E2F2               | Inhibited                  | -2.236             | 4.50E-04           | -1.89              | 3.80E-04           |
| MYCN               | Inhibited                  | -2.779             | 5.42E-04           | -3.966             | 6.06E-06           |
| HEY2               | Inhibited                  | -2.168             | 9.36E-04           | -1.939             | 2.48E-02           |
| NFE2L2             | Inhibited                  | -2.707             | 4.29E-02           | -0.343             | 1.13E-03           |
| AHR                | Inhibited                  | -2.85              | 8.86E-04           | -3.355             | 1.64E-05           |
| SPDEF              | Inhibited                  | -2.236             | 1.14E-01           | -3.162             | 4.25E-03           |

\*TF: transcriptional factors in Molecule Type

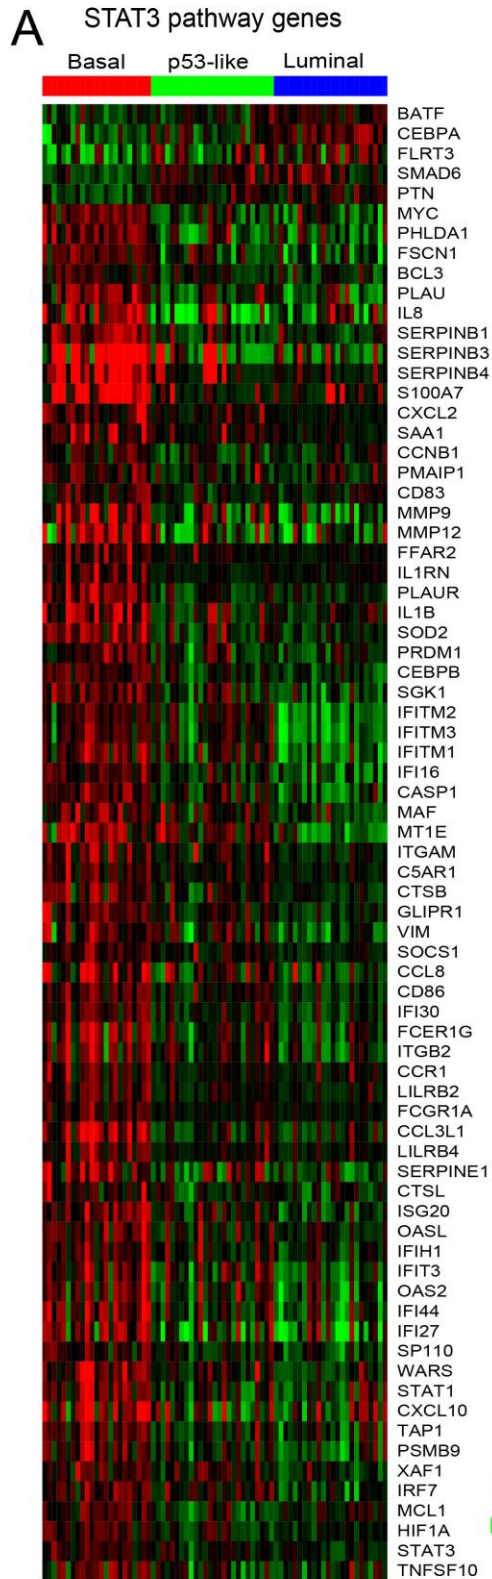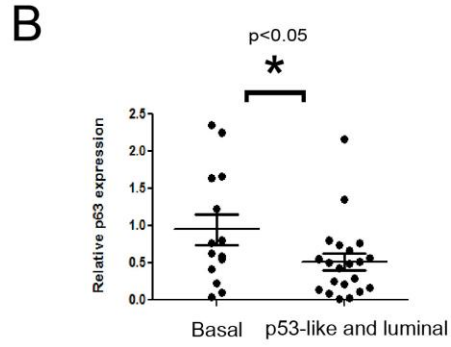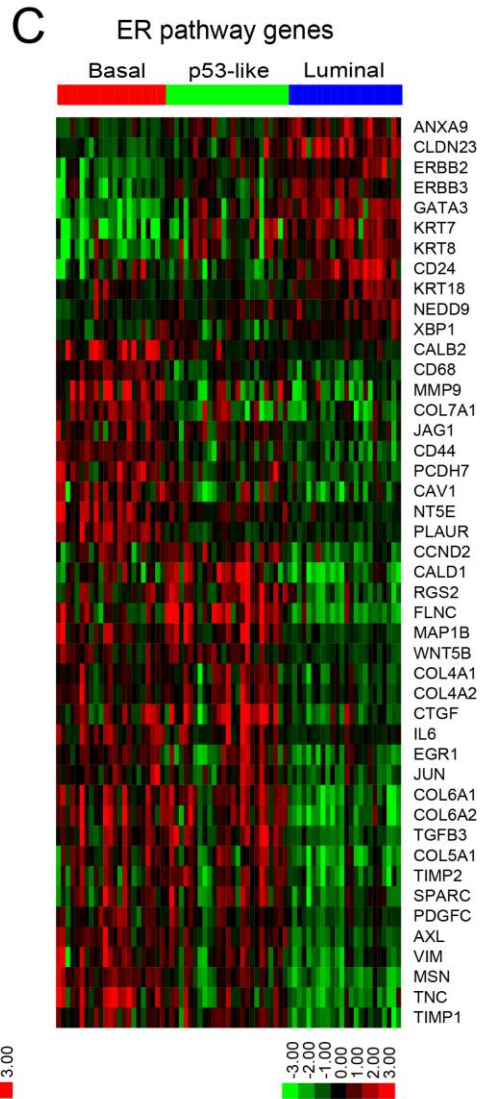

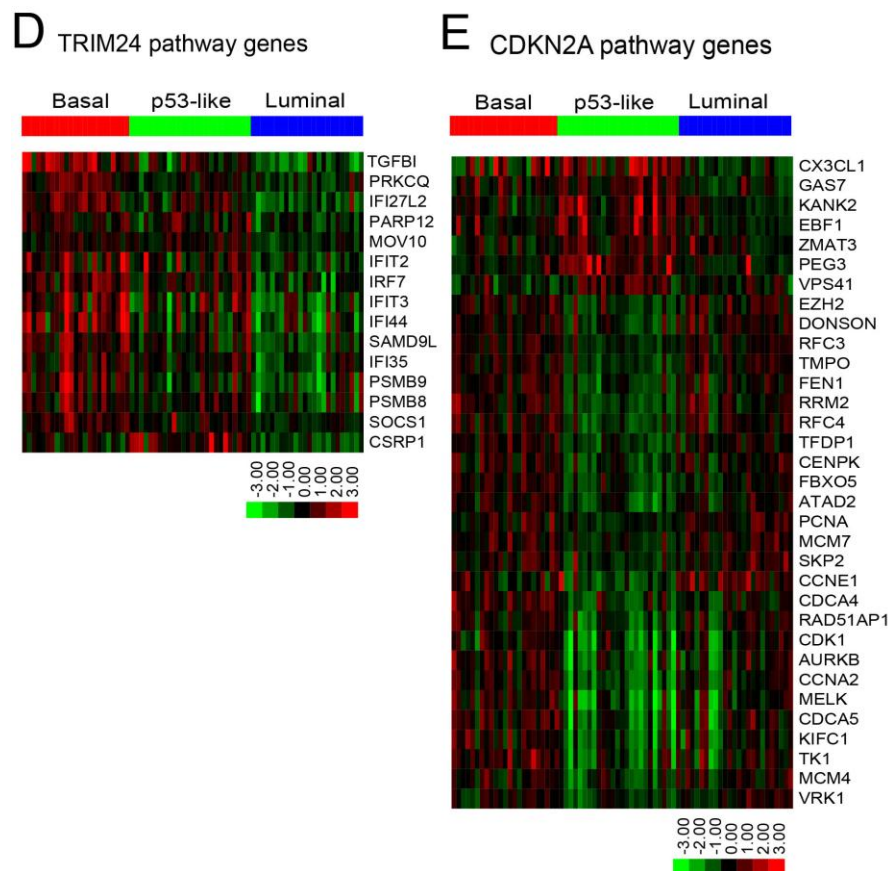

**Figure S3. Related to Figure 4.**

Expression of transcriptional targets of each upstream regulator in the three subtypes. A. STAT3 pathway genes in the basal subtype as determined by IPA analysis. B. TP63 qPCR data using randomly selected samples from basal and luminal tumors are shown by the mean with SEM. C. ER pathway genes in the luminal subtype. D. TRIM24 pathway genes in the luminal subtype. E. CDKN2A pathway genes in p53-like subtype.

**A UC14 p63KD**

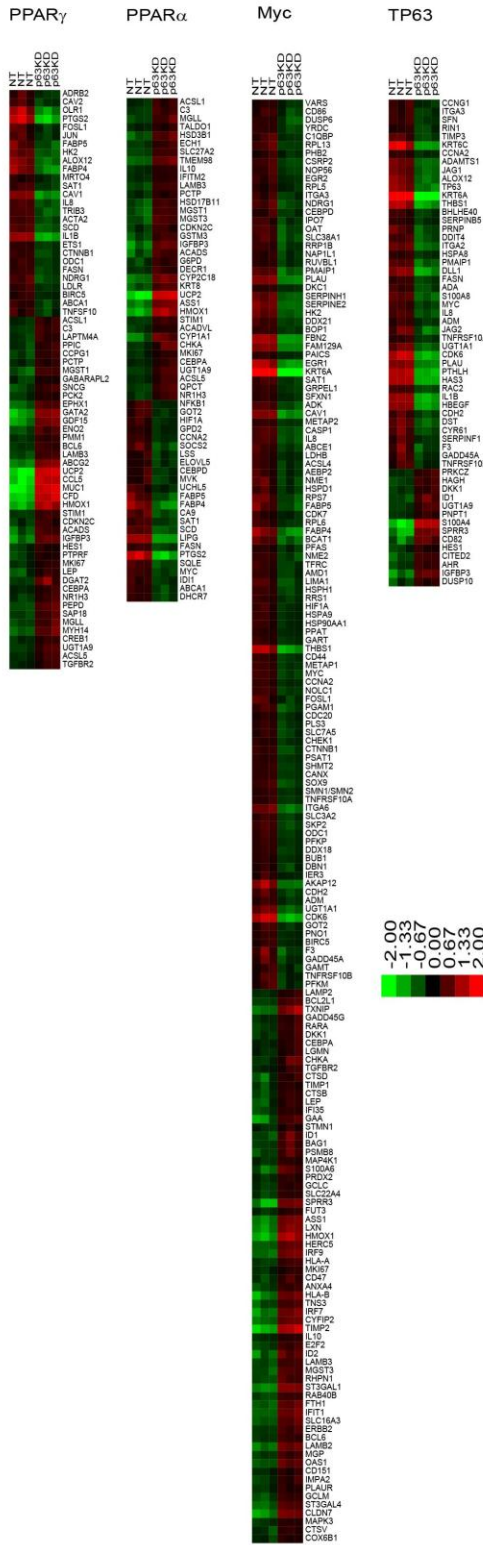

**B UC7 Rosiglitazone**

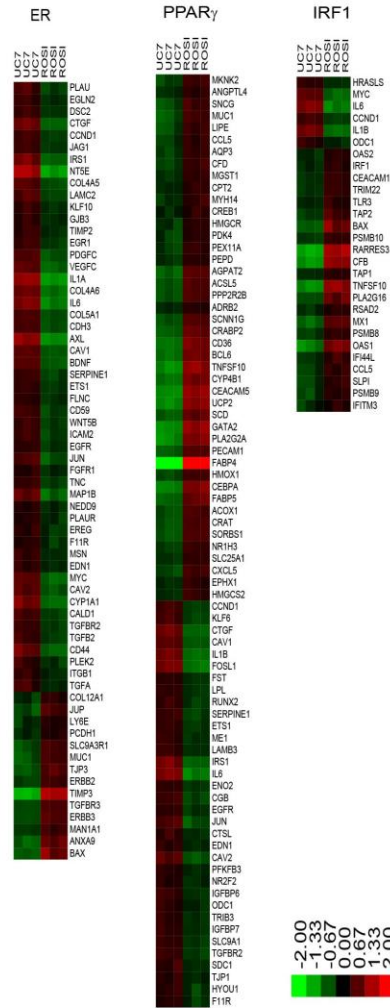

C UC9 Rosiglitazone

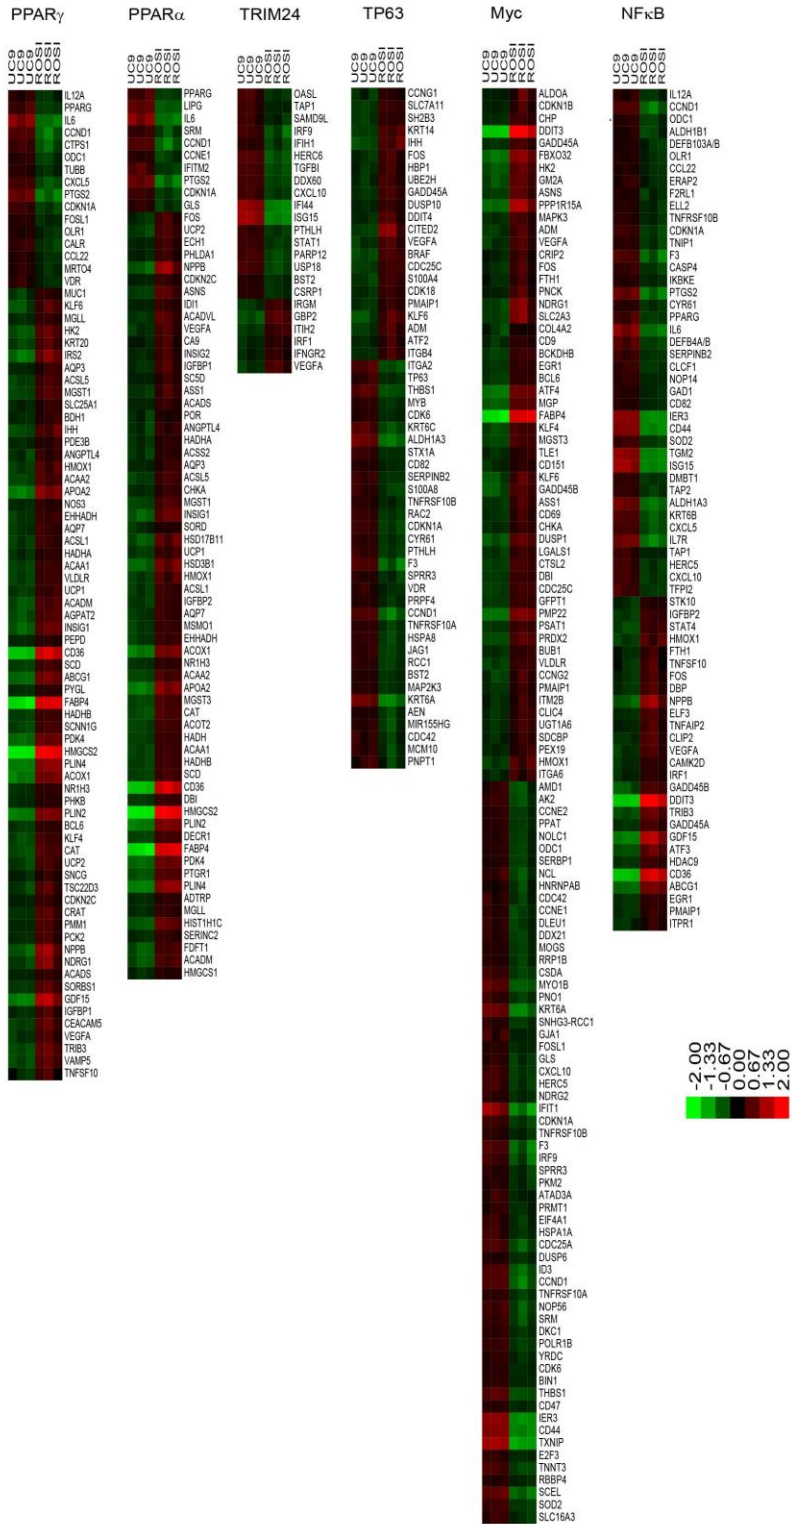

**Figure S4. Related to Figure 5.**

Heat maps depicting the changes in IPA upstream regulator-associated gene expression resulting from the modulation of basal and luminal transcriptional factors. A. Effects of TP63 knockdown on upstream regulators in UC14. B. Effects of the PPAR $\gamma$  agonist rosiglitazone on upstream regulators in UC7. C. Effects of rosiglitazone on upstream regulators in UC9.

**Table S8. Related to Figure 6.**

| MD Anderson Neoadjuvant Chemotherapy Cohort (n=34*) |            |            |            |             |              |
|-----------------------------------------------------|------------|------------|------------|-------------|--------------|
|                                                     | TOTAL      | Basal      | p53-like   | Luminal     | p-value      |
| Cohort Size (n)                                     | 34         | 9 (26.5%)  | 15 (44.1%) | 10 (29.4%)  |              |
| Mean Age (y) ± SD                                   | 65.3 ± 7.3 | 63.7 ± 5.2 | 68.1 ± 4.4 | 62.5 ± 10.7 | 0.128        |
| Gender (n)                                          |            |            |            |             |              |
| Male                                                | 22 (65%)   | 5 (56%)    | 8 (53%)    | 9 (90%)     | 0.137        |
| Female                                              | 12 (35%)   | 4 (44%)    | 7 (47%)    | 1 (10%)     |              |
| Race (n)                                            |            |            |            |             |              |
| Caucasian                                           | 26 (76%)   | 6 (67%)    | 13 (86%)   | 7 (70%)     | 0.788        |
| African American                                    | 5 (15%)    | 2 (22%)    | 1 (7%)     | 2 (20%)     |              |
| Hispanic                                            | 3 (9%)     | 1 (11%)    | 1 (7%)     | 1 (13%)     |              |
| Clinical Stage at TUR (n)                           |            |            |            |             |              |
| ≤ cT1N0M0                                           | 0 (0%)     | 0 (0%)     | 0 (0%)     | 0 (0%)      | 0.244        |
| cT2N0M0                                             | 12 (35%)   | 6 (67%)    | 4 (27%)    | 2 (20%)     |              |
| cT3N0M0                                             | 16 (47%)   | 2 (22%)    | 8 (53%)    | 6 (60%)     |              |
| cT4N0M0                                             | 6 (18%)    | 1 (11%)    | 3 (20%)    | 2 (20%)     |              |
| Positive Clinical Lymph Nodes, cN+ (n)              | 0 (0%)     | 0 (0%)     | 0 (0%)     | 0 (0%)      |              |
| Positive Clinical Metastasis, cM+ (n)               | 0 (0%)     | 0 (0%)     | 0 (0%)     | 0 (0%)      |              |
| Pathologic T stage (n)                              |            |            |            |             |              |
| pT0                                                 | 10 (29%)   | 5 (56%)    | 2 (13%)    | 3 (30%)     | 0.267        |
| pTa, pT1, pTis                                      | 5 (15%)    | 1 (11%)    | 1 (7%)     | 3 (30%)     |              |
| pT2                                                 | 2 (6%)     | 0 (0%)     | 2 (13%)    | 0 (0%)      |              |
| pT3                                                 | 10 (29%)   | 2 (22%)    | 6 (40%)    | 2 (20%)     |              |
| pT4                                                 | 7 (21%)    | 1 (11%)    | 4 (27%)    | 2 (20%)     |              |
| Positive Pathologic Lymph Nodes (n)                 | 14 (42%)   | 2 (22%)    | 10 (67%)   | 2 (20%)     | <b>0.027</b> |
| Variant histology at TUR                            |            |            |            |             |              |
| Squamous Differentiation                            | 4 (12%)    | 2 (22%)    | 2 (13%)    | 0 (0%)      | 0.385        |
| Sarcomatoid Differentiation                         | 1 (3%)     | 1 (11%)    | 0 (0%)     | 0 (0%)      |              |
| Other (Micropapillary, Glandular, Adenocarcinoma)   | 3 (9%)     | 0 (0%)     | 2 (13%)    | 1 (10%)     |              |
| Response to NAC (p0 or ≤pT1) <sup>^</sup>           |            |            |            |             |              |
| Yes                                                 | 13 (38%)   | 5 (56%)    | 2 (13%)    | 6 (60%)     | <b>0.029</b> |
| No                                                  | 21 (62%)   | 4 (44%)    | 13 (87%)   | 4 (40%)     |              |
| Median Overall Survival (m)                         | 42.8       | 42.8       | 25.4       | 65.6        | 0.147        |
| Median Disease Specific Survival(m)                 | 46.3       | 42.8       | 35.4       | 65.6        | 0.217        |

<sup>^</sup>Response to NAC= Decrease in stage to pT0 or pT1 (for patients with high risk features at TUR: lymphovascular invasion, variant histology, hydronephrosis, or abnormal exam under anesthesia) at cystectomy. \* Combination of 18 tumors from Discovery cohort with NAC and 16 tumors from patients treated with NAC on- and off- protocol. The Kruskal-Wallis test was used to compare differences in mean age between groups. Log-rank test was used to compare differences in survival (overall and disease specific) between groups. For the remainder of categorical variables, Fisher's exact test was used to determine differences between subtypes. p-values <0.05 were considered significant.



**Table S9. Related to Figure 6.**

MD Anderson Phase III MVAC Neoadjuvant Chemotherapy Validation Cohort (n=23)

|                                     | TOTAL       | Basal      | p53-like   | Luminal     | p-value |
|-------------------------------------|-------------|------------|------------|-------------|---------|
| Cohort Size (n)                     | 23          | 10 (43%)   | 6 (26%)    | 7 (30%)     |         |
| Mean Age (y) ± SD                   | 64.3 ± 10.2 | 61.1 ± 8.1 | 69.0 ± 7.7 | 64.8 ± 13.9 | 0.129   |
| Gender (n)                          |             |            |            |             |         |
| Male                                | 17 (74%)    | 7 (70%)    | 5 (83%)    | 5 (71%)     | 0.828   |
| Female                              | 6 (26%)     | 3 (30%)    | 1 (17%)    | 2 (29%)     |         |
| Race                                |             |            |            |             |         |
| Caucasian                           | 20 (87%)    | 7 (70%)    | 6 (100%)   | 7 (100%)    | 0.106   |
| African American                    | 3 (13%)     | 3 (30%)    | 0 (0%)     | 0 (0%)      |         |
| Clinical Stage at TUR (n)           |             |            |            |             |         |
| cT1N0M0                             | 0 (0%)      | 0 (0%)     | 0 (0%)     | 0 (0%)      | 0.209   |
| cT2N0M0                             | 15 (65%)    | 5 (50%)    | 4 (67%)    | 6 (86%)     |         |
| cT3N0M0                             | 7 (30%)     | 5 (50%)    | 1 (17%)    | 1 (14%)     |         |
| cT4N0M0                             | 1 (4%)      | 0 (0%)     | 1 (17%)    | 0 (0%)      |         |
| Positive Clinical Lymph Nodes, cN+  | 0 (0%)      | 0 (0%)     | 0 (0%)     | 0 (0%)      |         |
| Positive Clinical Metastasis, cM+   | 0 (0%)      | 0 (0%)     | 0 (0%)     | 0 (0%)      |         |
| Treatment: Cystectomy               | 23 (100%)   | 10 (100%)  | 6 (100%)   | 7 (100%)    |         |
| Pathologic T Stage                  |             |            |            |             |         |
| pT0                                 | 4 (17%)     | 4 (40%)    | 0 (0%)     | 0 (0%)      | 0.084   |
| pTa, pT1, pTis                      | 2 (9%)      | 0 (0%)     | 0 (0%)     | 2 (29%)     |         |
| pT2                                 | 8 (35%)     | 2 (20%)    | 3 (50%)    | 3 (43%)     |         |
| pT3                                 | 8 (35%)     | 4 (40%)    | 2 (33%)    | 2 (29%)     |         |
| pT4                                 | 1 (4%)      | 0 (0%)     | 1 (17%)    | 0 (0%)      |         |
| Positive Pathologic Lymph Nodes (n) | 3 (13%)     | 0 (0%)     | 1 (17%)    | 2 (29%)     | 0.217   |
| Variant histology at TUR            |             |            |            |             |         |
| Squamous Differentiation            | 4 (17%)     | 3 (30%)    | 1 (17%)    | 0 (0%)      | 0.404   |
| Sarcomatoid Features <sup>^</sup>   | 1 (4%)      | 1 (10%)    | 0 (0%)     | 0 (0%)      |         |
| Focal Glandular <sup>*</sup>        | 1 (4%)      | 0 (0%)     | 0 (0%)     | 1 (14%)     |         |
| Micropapillary                      | 1 (4%)      | 0 (0%)     | 0 (0%)     | 1 (14%)     |         |
| Response to NAC (p0 or ≤pT1)        |             |            |            |             |         |
| Yes                                 | 6 (26%)     | 4 (40%)    | 0 (0%)     | 2 (29%)     | 0.208   |
| No                                  | 17 (74%)    | 6 (60%)    | 6 (100%)   | 5 (71%)     |         |

<sup>^</sup>Patient also had focal glandular component on TUR pathology but ultimately had sarcomatoid carcinoma on analysis of cystectomy specimen. <sup>\*</sup>Pathology on cystectomy was adenocarcinoma.

**Table S10. Related to Figure 7.**

Philadelphia Phase II DDMVAC cohort (n=43)

|                                     | TOTAL    | Basal    | p53-like | Luminal  | p-value      |
|-------------------------------------|----------|----------|----------|----------|--------------|
| Cohort Size (n)                     | 43       | 14 (33%) | 9 (21%)  | 20 (46%) |              |
| Gender (n)                          |          |          |          |          |              |
| Male                                | 29 (67%) | 9 (64%)  | 7 (78%)  | 13 (65%) | 0.757        |
| Female                              | 14 (33%) | 5 (36%)  | 2 (22%)  | 7 (35%)  |              |
| Race (n)                            |          |          |          |          |              |
| Caucasian                           | 38 (88%) | 11 (79%) | 9 (100%) | 18 (90%) | 0.465        |
| African American                    | 4 (9%)   | 2 (14%)  | 0 (0%)   | 2 (10%)  |              |
| Asian                               | 1 (2%)   | 1 (7%)   | 0 (0%)   | 0 (0%)   |              |
| Clinical Stage at TUR (n)           |          |          |          |          |              |
| ≤ cT1N0M0*                          | 1 (2%)   | 0 (0%)   | 0 (0%)   | 1 (5%)   | 0.059        |
| cT2N0M0                             | 15 (35%) | 4 (29%)  | 1 (11%)  | 10 (53%) |              |
| cT3N0M0                             | 18 (42%) | 6 (43%)  | 8 (89%)  | 4 (21%)  |              |
| cT4N0M0                             | 6 (14%)  | 4 (29%)  | 0 (0%)   | 2 (5%)   |              |
| Positive Clinical Lymph Nodes (n)   | 3 (7%)   | 0 (0%)   | 0 (0%)   | 3 (16%)  | 0.059        |
| Pathologic T stage (n)              |          |          |          |          |              |
| pT0                                 | 15 (35%) | 7 (50%)  | 1 (11%)  | 7 (35%)  | <b>0.033</b> |
| pTa, pT1, pTis                      | 8 (19%)  | 2 (14%)  | 0 (0%)   | 6 (30%)  |              |
| pT2                                 | 9 (21%)  | 2 (14%)  | 3 (33%)  | 4 (20%)  |              |
| pT3                                 | 8 (19%)  | 1 (7%)   | 5 (56%)  | 2 (10%)  |              |
| pT4                                 | 3 (7%)   | 2 (14%)  | 0 (0%)   | 1 (5%)   |              |
| Positive Pathologic Lymph Nodes (n) | 5 (12%)  | 2 (14%)  | 2 (22%)  | 1 (5%)   | 0.380        |
| Variant histology at TUR            |          |          |          |          |              |
| Squamous Differentiation            | 4 (9%)   | 4 (29%)  | 0 (0%)   | 0 (0%)   | <b>0.012</b> |
| Nested Variant                      | 1 (2%)   | 0 (0%)   | 1 (11%)  | 0 (0%)   |              |
| Response to NAC (p0 or ≤pT1)^       |          |          |          |          |              |
| Yes                                 | 20 (47%) | 7 (50%)  | 1 (11%)  | 12 (60%) | <b>0.048</b> |
| No                                  | 23 (53%) | 7 (50%)  | 8 (89%)  | 8 (40%)  |              |

^Response to NAC= Decrease in stage to pT0 or pT1 (for patients with abnormal exam under anesthesia at TUR denoting cT3/T4) at cystectomy. \*Patients with upper tract tumors and high grade disease are considered candidates for NAC despite non-muscle invasive disease

**Table S11. Related to Figure 7.** Provided as an Excel file.

Probes that defined p53-ness in the p53-like subtype.

Probes that were shared between the p53-like and chemoresistant tumors.

Probes that defined p53-ness in the chemoresistant tumors .

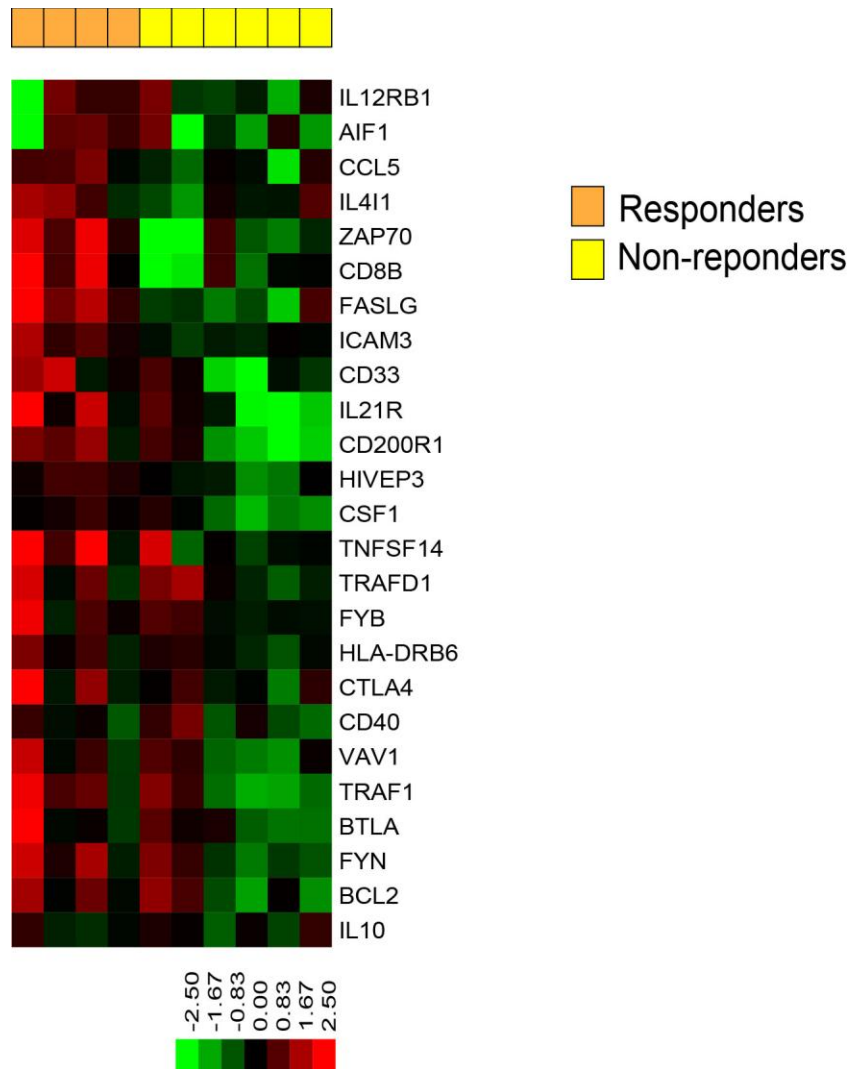

**Figure S5. Related to Figure 7.**

Heat map depicting the expression of the immune signature identified in the Philadelphia basal tumors in the sensitive basal tumors from the MD Anderson Phase III MVAC cohort.

## Supplemental Experimental Procedures

**Microarray Experiments and Data Processing:** Total RNA from fresh frozen and formalin-fixed, paraffin-embedded human specimens was isolated using the mirVana™ miRNA isolation kit (Ambion, Inc) and the High Pure miRNA isolation kit (Roche), respectively. RNA purity and integrity were measured by NanoDrop ND-1000 and Agilent Bioanalyzer and only high quality RNA was used for the cRNA amplification. For the fresh frozen specimens, direct hybridization assays were performed using the Illumina RNA amplification kit (Ambion, Inc, Austin, TX) and Illumina HT12 V3 chips (Illumina, Inc., San Diego, CA). For the formalin-fixed, paraffin-embedded specimens, DASL (Illumina) was employed using WG-DASL HT12 V4 chips. Slides were scanned with Bead Station 500X and signal intensities were quantified with GenomeStudio (Illumina, Inc.). Quantile normalization in the Linear Models for Microarray Data (LIMMA) package in the R language environment was used to normalize the data. Gene expression profiling data were uploaded to Gene Expression Omnibus with accession numbers GSE48277 and GSE47993.

BRB ArrayTools version 4.2 developed by National Cancer Institute was used to analyze the data. To identify molecular subtypes, we subjected the data obtained with the fresh frozen (“discovery”) cohort to unsupervised hierarchical cluster analysis using the 6700 probes that exhibited expression ratios of at least 2-fold relative to the median gene expression level across all samples in at least 7 samples. The significantly differentially expressed genes for each subset (basal vs. the rest, p53-like vs. the rest and luminal vs. the rest) in the discovery cohort ( $p < 0.001$  with FDR  $< 0.1$ , 1.5 fold cut-off) were then extracted and combined to yield 2,507 differentially expressed genes (2,998 probes). Since the discovery cohort, the validation cohort (57 tumors) and the Chungbuk cohort used different versions of the array platform (HT12V3, WG-DASL HT12 V4, and human 6V2 chips, respectively), we used only the 2,709 out of 2,998 probes that were shared between the discovery and validation platforms and the 2,409 out of

2507 genes that were shared between the discovery and Chungbuk validation platforms, respectively. These feature sets were further refined by subjecting them to an F-test ( $p < 0.001$ ), yielding 2,446 probes for the analysis of the validation cohort and 2,160 genes for analysis of the Chungbuk cohort. Each refined feature set was independently centralized and then used to form a oneNN classifier using the discovery cohort, and the prediction accuracy of resulting classifier was tested using leave one out cross validation (LOOCV)(Dudoit et al., 2002; Simon et al., 2003). For LOOCV in the training set, the entire model building process was repeated, including the gene selection process. We also examined whether the cross-validated error rate estimate for a model was significantly less than would be expected from random prediction.

We correlated the presence of squamous features with basal subtype membership in the Lund and UCSF gene expression profiling datasets. Since the MD Anderson discovery and Lund cohorts were analyzed using the same array platform (Illumina HT12v3 chip), the 2998 probes that were significantly differentially expressed in each MIBC subtype in the MD Anderson discovery cohort were used to perform an F-test ( $p < 0.001$ ), yielding 2,697 probe sets. Because the UCSF tumors were analyzed using an in-house custom array platform, only the 1,058 genes (out of 2,507) that were common to the UCSF and Illumina platforms were used to perform an F-test to refine the UCSF feature sets (964 genes). Each refined feature set was independently centralized and then used to form a classifier using the MD Anderson discovery cohort. To examine the relative chemotherapy sensitivities of the 3 different MIBC molecular subtypes, we performed prediction analyses using DASL data from the discovery cohort plus 16 additional tumors from patients treated with NAC on- and off-protocol, 23 tumors from a Phase III trial of conventional MVAC (Millikan et al., 2001), 43 TUR tumors and 43 TUR tumors plus all available ( $n = 20$ ) matched cystectomy tumors from a Phase II clinical trial of dose dense MVAC (DDMVAC). The tumors in each were combined with the MD Anderson validation cohort ( $n = 57$  tumors) and prediction analyses were performed using same probe IDs identified previously

(2,446 probes). After subtype membership was assigned, significantly expressed genes within the basal or luminal tumor subtypes that did or did not respond to chemotherapy were extracted using class comparison tools in BRB ArrayTools (responders vs non-responders in each subsets,  $p < 0.001$  with  $FDR < 0.2$ ). Using the same tools, the differentially expressed genes between UC14 cells transduced with non-targeting (NT) or p63-specific shRNAs, or vehicle- or rosiglitazone-exposed UC7 and UC9 cells, were extracted ( $p < 0.001$  with  $FDR < 0.1$ ) to perform IPA (1.5-fold cut-off) yielding 2473 probes for UC14, 1546 probes for UC7 and 1673 probes for UC9, and GSEA (2-fold cut-off) yielding 893 probes for UC14, 443 probes for UC7 and 353 probes for UC9. In order to identify a chemoresistance-associated gene signature, a paired t-test (using class comparison tools) was performed on the 20 matched pairs of pre- and post-treatment DDMVAC tumors, yielding 2469 probes ( $p < 0.001$  with  $FDR < 0.1$ , 1.5-fold cut-off) that were used for subsequent IPA. To visualize gene expression patterns, specific gene expression values, adjusted to a median of zero, were used for clustering using Cluster 3.0 and TreeView (Eisen et al., 1998). The probe with larger standard deviation was used for heat map if there are multiple probes for the same gene.

**Silhouette score analyses:** Silhouette scores were calculated to determine the accuracy of subset membership assignments (Rousseeuw, 1987). The silhouette score for each sample is a measure of how similar that sample is to all other samples in its own cluster compared to the samples in other clusters. More specifically, it is defined as:

$$S(i) = \frac{a_i - b_i}{\min(a_i, b_i)}$$

where  $a_i$  is the average distance from the  $i^{\text{th}}$  sample to the other samples in the same cluster as  $i$ , and  $b_i$  is the minimum average distance from the  $i^{\text{th}}$  sample to samples in a different cluster, minimized over clusters.

**Gene Set Enrichment Analyses:** For GSEA, selected breast basal/luminal markers and an immune signature that was defined by the literature were tested for enrichment in basal and luminal tumors from the MD Anderson discovery cohort and the chemotherapy responders and non-responders within the Philadelphia basal subtype of tumors, respectively (Subramanian et al., 2005). Genes were sorted by the value of the signal to noise ratio against “basal vs luminal and p53-like” phenotype or “responders in basal vs non-responders in basal” phenotype, respectively.

**Pathway Analyses:** Functional and pathway analyses were performed using Ingenuity Pathway Analysis (IPA) software (Ingenuity® Systems, CA), which contains a database for identifying networks and pathways of interest in genomic data. “Transcriptional factors as molecule type in upstream regulator” categories within IPA were used to interpret the biological properties of the bladder tumor subtypes. For upstream regulator analyses, IPA performs statistical analyses for overlap p values and an activation Z-score. Based on the IPA knowledge database, p values and Z-scores can be calculated based on how many targets of each transcriptional factor were overwrapped (p values) and the extent of concordance of the known effects (activation or inhibition) of the targets in the gene lists (Z-score). Enrichment of KEGG pathway ECM/stromal infiltration in the p53-like tumors was investigated using WebGestalt (<http://genereg.ornl.gov/webgestalt>) (Wang et al., 2013).

**Sequencing Analyses.** Sequencing analyses of *FGFR3*, *TP53*, *RB1* and *H/K/N/RAS* on the available tissues was performed on all available tumors within the MD Anderson discovery cohort (66/73). Sequencing was carried out by the ABI Big Dye terminator method. PCR products were purified from unincorporated primers and dNTPs by using exonuclease I and shrimp alkaline phosphatase and subsequent sequencing reactions were analyzed with an ABI 3730 sequencer (Applied Biosystems). Sequence was obtained from both strands and potential

mutations were identified using Mutation Surveyor software (Softgenetics, State College, PA, USA) and confirmed by visual inspection. For selected samples, the presence of mutations was confirmed by sequencing of subcloned amplified exons.

Sequence analysis of *TP53* status in 28 human bladder cancer cell lines was performed in the CCSG-supported genomics core at MD Anderson Cancer Center. Mutation detection was performed by amplifying purified DNA with primers designed to amplify the *TP53* coding regions. Primers were designed using a variety of software applications including, but not limited to, Primer Express v3.0 (Applied Biosystems). The PCR products were purified with ExoSAP-IT (USB) and sequenced in both directions using BigDye Terminator chemistry (Applied Biosystems) and run on a 3730 DNA Analyzer (Applied Biosystems). The sequence data files were aligned and compared to a reference sequence (from Ensembl) in SeqScape v2.5 Software (Applied Biosystems) and mutations analyzed.

**Tissue Microarrays and Immunohistochemistry:** Basal and luminal cytokeratins (KRT5/6 and KRT20) were analyzed on a tissue microarray consisting of 332 stage-matched (pT3) muscle invasive bladder cancer tissues. Immunohistochemical staining was performed in the MD Anderson Pathology Core using anti-KRT20 (clone Ks20.8), anti-KRT5/6 (clone D5/16 B4)(both from Dako, Carpinteria, CA) and CD44 (HCAM;DF1485, Leica Biosystems, Buffalo Grove, IL) using established clinical protocols. For the TMA analyses, percentages of positive tumor cells were quantified using an automated digital image analyzer, GenoMx™ (Bio Genex, San Ramon, CA).

**Cell lines:** Cell lines were obtained from the MD Anderson Bladder SPORE Tissue Bank, and their identities were validated by DNA fingerprinting using AmpFISTR® Identifiler® Amplification kit (Applied Biosystems, Foster City, CA), performed by the MD Anderson Characterized Cell Line Core. Cell lines were cultured in modified Eagle's MEM supplemented with 10% fetal



bovine serum, vitamins, sodium pyruvate, L-glutamine, penicillin, streptomycin, and nonessential amino acids at 37 °C in 5% CO<sub>2</sub> incubator. To generate p63 stable knockdown cells, pan p63 targeting lentiviral shRNA constructs (Open Biosystems, V3LHS\_397885) and the pGIPZ lentiviral empty vector (Open Biosystems, RHS4339) were transfected into 293T cells to propagate lentiviral particles. Bladder cancer cells were plated in 6-well plates (12 × 10<sup>4</sup> cells/well), and medium containing lentiviral particles was added 24 h later. Cells were incubated with lentivirus for 16 h and were washed and cultured in fresh medium. Fluorescence-activated cell sorting (FACS) was performed after 4–5 d to isolate GFP positive cells, and these cells were then cultured in medium containing puromycin (4 µg/ml).

**Chemicals.** The PPAR $\gamma$  agonist rosiglitazone was purchased from Cayman Chemical (Ann Arbor, MI).

**Real-time Quantitative Reverse Transcriptase PCR analyses:** p63, cytokeratins (KRT5, KRT6A, KRT20), FOXA1 and CD44 were analyzed by real-time PCR (StepOne; Applied Biosystems, Foster City, CA) using TaqMan primers (Applied Biosystems). All calculations and analyses were performed using StepOne<sup>TM</sup> Software (Applied Biosystems) that uses the 2<sup>- $\Delta\Delta$ Ct</sup> method with a relative quantification (RQ)<sub>min</sub>/RQ<sub>max</sub> (95% confidence level) (Livak and Schmittgen, 2001). The cyclophilin A gene was used as an internal control to normalize for the amount of amplifiable RNA in each reaction. Levels of miR-200b and -c in primary tumors were also quantified by RT-PCR. Total RNA including miRNA was extracted using the mirVana<sup>TM</sup> miRNA isolation kit (Ambion, Inc) and 10 ng total RNA along with miR-specific primers were used for expression analysis based on the TaqMan MicroRNA Assay system (Applied Biosystems). miRNA U6 expression was used as an internal standard and the 2<sup>- $\Delta\Delta$ Ct</sup> method was used to generate relative expression values. TaqMan primers for hsa-miR-200b (002251) and hsa-miR-200c (002300) were purchased from Applied Biosystems.

## Supplemental References

- Livak, K. J., and Schmittgen, T. D. (2001). Analysis of relative gene expression data using real-time quantitative PCR and the  $2^{-\Delta\Delta C(T)}$  Method. *Methods* 25, 402-408.
- Rousseeuw, P. J. (1987). Silhouettes: A graphical aid to the interpretation and validation of cluster analysis. *J Comput Appl Math* 20, 53-65.
- Simon, R., Radmacher, M. D., Dobbin, K., and McShane, L. M. (2003). Pitfalls in the use of DNA microarray data for diagnostic and prognostic classification. *Journal of the National Cancer Institute* 95, 14-18.
- Subramanian, A., Tamayo, P., Mootha, V. K., Mukherjee, S., Ebert, B. L., Gillette, M. A., Paulovich, A., Pomeroy, S. L., Golub, T. R., Lander, E. S., and Mesirov, J. P. (2005). Gene set enrichment analysis: a knowledge-based approach for interpreting genome-wide expression profiles. *Proceedings of the National Academy of Sciences of the United States of America* 102, 15545-15550.
- Wang, J., Duncan, D., Shi, Z., and Zhang, B. (2013). WEB-based GENE SeT AnaLysis Toolkit (WebGestalt): update 2013. *Nucleic acids research* 41, W77-83.
